# Supplementary material for: Intraocular pressure responses during maximal and submaximal handgrip strength tasks in primary open-angle glaucoma patients and healthy individuals
Source: PeerJ. 2025 Aug 26;13:e19845. doi: 10.7717/peerj.19845 (PMC12396205; doi:10.7717/peerj.19845)
Supplement: Supplemental Information 1 [file peerj-13-19845-s001.xlsx]

## Sheet: All
Group	Sex	Age	Weight	Height	MaxStrength_RightHand_RightEye	MaxStrength_LeftHand_LeftEye	MedStrength_RightHand_RightEye	MedStrength_LeftHand_LeftEye	MaxStrength_RightHand_LeftEye	MaxStrength_LeftHand_RightEye	MedStrength_RightHand_LeftEye	MedStrength_LeftHand_RightEye	IOPBefore_MaxStrength_RightHand_RightEye	IOPBefore_MaxStrength_LeftHand_LeftEye	IOPBefore_MedStrength_RightHand_RightEye	IOPBefore_MedStrength_LeftHand_LeftEye	IOPBefore_MaxStrength_RightHand_LeftEye	IOPBefore_MaxStrength_LeftHand_RightEye	IOPBefore_MedStrength_RightHand_LeftEye	IOPBefore_MedStrength_LeftHand_RightEye	IOPDuring_MaxStrength_RightHand_RightEye	IOPDuring_MaxStrength_LeftHand_LeftEye	IOPDuring_MedStrength_RightHand_RightEye	IOPDuring_MedStrength_LeftHand_LeftEye	IOPDuring_MaxStrength_RightHand_LeftEye	IOPDuring_MaxStrength_LeftHand_RightEye	IOPDuring_MedStrength_RightHand_LeftEye	IOPDuring_MedStrength_LeftHand_RightEye	IOPPost_MaxStrength_RightHand_RightEye	IOPPost_MaxStrength_LeftHand_LeftEye	IOPPost_MedStrength_RightHand_RightEye	IOPPost_MedStrength_LeftHand_LeftEye	IOPPost_MaxStrength_RightHand_LeftEye	IOPPost_MaxStrength_LeftHand_RightEye	IOPPost_MedStrength_RightHand_LeftEye	IOPPost_MedStrength_LeftHand_RightEye	MaxStrength	MedStrength	IOPBefore_max	IOPBefore_med	IOPDuring_max	IOPDuring_med	IOPPost_max	IOPPost_med
1	2	80	61	151	14.8	16.2	8	10	17.5	14.1	6.7	5.6	10	11	10	11	10	11	9	10	11	10	10	9	10	11	10	12	10	13	11	7.4	11	13	10	14	15.65	7.575	10.5	10	10.5	10.25	11.75	10.6
1	2	72	63	155	14.7	15.7	6.4	10	14.8	16.6	6.6	11.7	16	14	15	14	16	11	15	16	15	15	15	16	16	13	18	11	14	16	15	16	18	12	17	12	15.45	8.675	14.25	15	14.75	15	15	15
1	2	62	84	155	15.1	18.1	5.4	8.3	15.1	18.4	10.3	15.4	18.9	17.2	16.4	18.1	11	15.5	18	19	19	17.6	16.1	18.9	13.9	15.8	17	20	17.6	17.6	17.3	18	14.1	15.2	18	20	16.675	9.85	15.65	17.875	16.575	18	16.125	18.325
1	1	58	98.8	163.6	29.6	33.9	17.5	22.8	28.5	30.4	13.5	17.8	17.1	13.5	15.9	15.1	15.1	15.5	16.2	16.2	19.1	17.3	16.5	16.2	18.8	18.4	16.9	18.1	16.3	14.4	15.5	14.9	15.3	14.6	16.5	15.9	30.6	17.9	15.3	15.85	18.4	16.925	15.15	15.7
1	2	72	68.5	153.1	21.5	22.1	13	17.7	22.4	17.8	20.3	18.3	12	12	13	12	12	12	10	11	13	14	13	12	13	12	11	11	14	14	19.6	12	12	12	11	10	20.95	17.325	12	11.5	13	11.75	13	13.15
1	1	68	68	167	41.6	32.4	18.4	11.4	41.4	36.6	13.3	8.1	23.8	25.9	23.3	22.3	22	22	21	23	23.9	26.7	24	22.4	23	23	24	25	23.3	24.1	22.1	24.4	23	23	23	25	38	12.8	23.425	22.4	24.15	23.85	23.35	23.625
1	1	72	102.5	174.5	41.7	33.7	9.1	14.2	44.4	34.2	19.6	18.6	13	16	16	16	17	14	15	16	15	16	16	15	16	19	13	16	16	16.3	15	8.1	16	19	13	16	38.5	15.375	15	15.75	16.5	15	16.825	13.025
1	2	67	58	157	30.1	26.7	18.3	13.2	27.6	25.8	13.5	21	17.6	15	17.3	19	17.6	17.8	20.8	20.4	18.4	19.5	18	20.5	19.6	19.6	21.75	20.5	19.8	16.4	19.6	18.6	17.7	18	19.6	18.3	27.55	16.5	17	19.375	19.275	20.1875	17.975	19.025
1	1	63	68	161	48.2	44.2	28.7	24.8	45.9	42	25.6	22.5	14.2	14.5	14.8	15.5	14.5	14.9	14.9	14.4	19.1	18.4	16.7	16.1	18.3	18.2	14.7	15.1	16.1	16.3	15.7	15.3	15.1	15.5	15.1	15.3	45.075	25.4	14.525	14.9	18.5	15.65	15.75	15.35
1	2	53	65.7	165.3	29.2	26.7	17.8	17.1	28.8	29.8	18.2	19.6	13.7	14.7	14.3	14.3	13.9	12.9	13.4	14.9	15.3	15.6	15.3	15.2	16.3	16.3	15.4	14.8	14.6	15.6	14.3	14.8	14.2	14.5	14.7	15.1	28.625	18.175	13.8	14.225	15.875	15.175	14.725	14.725
1	1	58	81.5	172	39.3	37.8	19.7	15.9	38.6	35.8	18.8	19.8	14.1	14.8	14.7	14.6	15.3	15.7	16.1	13.9	18.2	17.3	14.2	15.7	18.5	17.8	16.5	15.9	15.7	14.8	14.5	14.3	15.4	15.9	14.5	15.1	37.875	18.55	14.975	14.825	17.95	15.575	15.45	14.6
1	2	80	67	154	16.7	17.4	6.7	5	21.6	20.6	5.7	5.1	15.2	15.3	17.2	15.9	15	15.4	15.2	14.3	14.5	17.1	14.7	15.1	17.2	15.7	14.8	14.4	15	16.3	15.1	15.5	15.8	14.2	16	16.1	19.075	5.625	15.225	15.65	16.125	14.75	15.325	15.675
1	2	62	63.4	163	26.2	22.1	8.5	9	28.1	22.2	9.1	8.7	17	17.7	16.8	16.9	18	16.9	17.4	17.3	24.1	23.6	18	16.8	25.3	22.6	17.1	17.2	22.2	22.1	16.9	16.2	21.2	20.1	17	17.3	24.65	8.825	17.4	17.1	23.9	17.275	21.4	16.85
1	1	64	70	163	43.9	41.7	15	18.3	44.8	38.4	22.2	14.5	15.6	14.1	14.3	17.2	15	14.3	16.2	15	15.5	16.6	14.7	16.6	16	16.8	17.8	18.3	15.8	17.9	14.9	17.9	18.3	12	16.8	17.9	42.2	17.5	14.75	15.675	16.225	16.85	16	16.875
1	1	76	90	172	23.4	24.8	15.3	13.5	25.8	25.7	14.5	14.5	18.4	14.4	15.3	16.3	13.9	15.8	15.9	17.1	17.6	16.4	15.4	16.2	18.2	18.4	15.6	14.6	17	13.8	15	16	15.5	14.5	15.2	15.2	24.925	14.45	15.625	16.15	17.65	15.45	15.2	15.35
1	2	74	58	166	20.3	16.1	7.5	9.4	21.5	17	10.2	8.9	14.3	18.2	16.1	20.2	20.2	15.3	19.9	14.7	16.5	23.3	14.8	20.3	23.5	16.3	20.3	14.1	16.4	20.5	15.3	20.2	21.1	15.8	20.1	14.6	18.725	9	17	17.725	19.9	17.375	18.45	17.55
1	2	74	77		19.1	17.9	8.5	7.5	21.8	18.8	11.2	9.7	23.2	21.2	18.9	23.1	19	26	21.2	23.8	25.9	21.8	22.8	23.3	21.1	27.5	22.6	23.3	25.4	22.3	25.4	23.4	17.9	26.1	22.6	23.9	19.4	9.225	22.35	21.75	24.075	23	22.925	23.825
1	1	65	73	176	29.3	28.4	16.4	17.9	31.7	29.9	19.7	14.4	10.9	16.5	13.2	16.2	13.5	13.3	15.7	10.5	14.1	17.3	12.1	15	15.1	13.3	15.2	13	10.3	16.1	12	14.5	14.1	12.9	15.5	12.5	29.825	17.1	13.55	13.9	14.95	13.825	13.35	13.625
1	2	71	72	150	18.8	14.4	9	7.3	17	17.6	9.3	8	13	18.2	15.4	15	17.7	13.4	15.7	11.8	15.5	19	12.2	13.8	15.2	12	13.7	11.8	13.5	17.2	12.4	17.3	16.3	14.2	14.9	12.1	16.95	8.4	15.575	14.475	15.425	12.875	15.3	14.175
1	2	74	60	163	22.7	21.5	19.7	16.8	22.8	22.7	17.1	12	16.1	15.8	17.2	16.4	14.3	17.3	15.3	19	18.5	15.9	16	16.1	15.2	18.2	14.5	17.2	16.6	15.5	17.3	14.2	14.5	17.4	15.5	15.5	22.425	16.4	15.875	16.975	16.95	15.95	16	15.625
1	2	81	45.6	145	11.2	13.9	7.8	7.2	10.3	12.3	9	5.1	12	14.4	11.5	14.9	14.8	13.3	15.2	11.2	12.4	15	10	14.2	13.3	11.3	14.1	11.3	13.2	15.1	12.3	15.4	15.4	11.8	15	13.8	11.925	7.275	13.625	13.2	13	12.4	13.875	14.125
2	1	63	72	167	31.7	30.4	13.8	8	27.1	30.1	15.3	10.5	16.5	13.7	15.3	15.8	13.6	18.6	16.6	17	14.3	15.3	18.1	16.1	16.7	21.5	14	14.5	16.7	16.4	16.5	14.7	15.1	17.4	13.7	15.9	29.825	11.9	15.6	16.175	16.95	15.675	16.4	15.2
2	1	76	70	167	34.4	28.2	9.7	13.7	34.4	29.4	6.5	8.7	9	12.4	11.2	11.3	10.3	10.1	10.4	9.5	12.5	13.3	10.3	12	11.8	10.4	11.5	10.3	10.4	11.2	10.6	10.8	10.3	9.7	11.4	11.3	31.6	9.65	10.45	10.6	12	11.025	10.4	11.025
2	1	67	62	165	36.3	30.4	20.6	22.3	35.7	28.5	18.8	24.6	24.9	24.4	23.2	20.3	23.4	23.1	24.7	24.6	25	27.7	24.6	21.6	26.7	24	23.4	23.3	22.8	22.3	23.3	18	22.5	23.4	22.2	22.6	32.725	21.575	23.95	23.2	25.85	23.225	22.75	21.525
2	1	74	92.2	175	32.3	29.1	5.1	5	29.7	29	6.7	7.8	15.5	15.6	11.7	9.7	10.7	15.8	9.2	15.7	18.4	17.9	18.1	12.6	13.6	19.4	10.6	16	16.4	14.1	17.7	12.2	10.6	14.9	9.2	13.7	30.025	6.15	14.4	11.575	17.325	14.325	14	13.2
2	2	63	60	154	20.4	18.2	9.3	14.5	19.1	21.2	8.7	13.9	22.6	18.5	17.2	17.3	19	18.5	19.5	16.4	24.8	23	22.2	19.9	23.2	23.5	23.5	20.8	22.8	21.9	20.7	19.8	20.8	20.6	20.3	18.1	19.725	11.6	19.65	17.6	23.625	21.6	21.525	19.725
2	2	71	57	165	17	15.6	6.9	9.9	19.4	18.3	6.9	8.9	20	17	20	17	16	16	14	16	20	18	20	17	16	17	16	17	17	16	16	16	17	15	15	16	17.575	8.15	17.25	16.75	17.75	17.5	16.25	15.75
2	2	65	58.7	164	24.8	21.8	12.1	10.5	22.1	19.1	13	13.7	12.4	14.4	16.1	14	13.2	12.8	14.3	12.1	15	15.9	13.9	15	15.9	14.1	15.2	15.3	13.4	114.4	14.5	13.5	15.4	13.2	14.5	14.5	21.95	12.325	13.2	14.125	15.225	14.85	39.1	14.25
2	2	65	68.7	156	16.4	18.3	8.5	7.3	19.7	15.8	8.3	11.7	13.7	18.5	15.4	13.7	19.9	13.3	16.6	14.2	15.9	19.2	14.4	14.9	18.2	14.2	17.3	12.4	12	17.9	12.5	16.3	14.7	13.6	16.2	15.5	17.55	8.95	16.35	14.975	16.875	14.75	14.55	15.125
2	2	64	68.4	155	22.7	15.8	7.6	6.5	20.1	12.4	13.2	5.7	17	21	17	19	20	19	16	15	18	20	18	15	21	18	16	16	16	19	19	17	19	17	17	16	17.75	8.25	19.25	16.75	19.25	16.25	17.75	17.25
2	2	73	73.4	162	17.9	19.7	13.3	8.3	13.6	20.4	9.3	6.8	26.7	25.3	22.7	21.8	25.4	24.1	24.1	23.8	27	25.9	27	24.8	28.4	29.1	25.3	24.4	23.2	23.5	25.7	23.7	25.4	26.2	23.4	21.8	17.9	9.425	25.375	23.1	27.6	25.375	24.575	23.65
2	2	67	58	150	19.8	18.6	12.3	6.5	20.3	18	7.6	6.8	26.7	18	21.6	18.7	16	21.9	18.7	18.1	29	18.2	23	17.9	17.6	22.4	18.6	23.8	20.7	19	22.6	18.3	18.8	21.8	16.9	22.3	19.175	8.3	20.65	19.275	21.8	20.825	20.075	20.025
2	2	65	66.1	157	20.9	17.7	10.5	8	17.6	21.5	11.1	13.3	17	16	15	17	17	19	20	18	17	20	17	17	23	20	18	16	15	15	16	19	19	18	19	17	19.425	10.725	17.25	17.5	20	17	16.75	17.75
2	1	67	105	180	28.3	33.7	24.5	26.7	36.1	34.3	28.8	25.5	19	16.7	15.4	21.7	21.3	19.6	9.8	19.3	17.5	17.1	17.3	21.2	21.6	14.8	20.2	15.6	16	23.5	17.8	16.1	16.7	17.9	21.3	16.9	33.1	26.375	19.15	16.55	17.75	18.575	18.525	18.025
2	2	81	71	159	19.2	14.8	12	9.2	18.5	13	15	8.7	12.2	11.7	14.2	8.8	10.4	12	10.6	13	11.8	8.6	12.5	10	9.6	12.9	9.1	11.2	13.9	9.7	13.2	8.8	9.3	12.1	9.9	13.3	16.375	11.225	11.575	11.65	10.725	10.7	11.25	11.3
2	1	81	81	173	26.4	23	16.2	18.8	25.4	21.3	18.5	12.6	18.3	15.8	19.5	17.3	14.2	19.4	17	19.8	20.7	19	20.9	11.1	21.2	20.4	19.7	18.5	18.1	17.1	18.8	16.8	18.4	20.1	18.7	19.5	24.025	16.525	16.925	18.4	20.325	17.55	18.425	18.45
2	2	67	60.3	150	19.3	17.8	18.3	15.8	21.5	19.4	17.9	12.9	16.3	15.5	15.6	14.3	16.6	16	15.7	17	16.1	18.7	15.9	16.7	18.4	16.2	15.3	16	16	15.8	16.3	17.1	15.6	15.6	16	16	19.5	16.225	16.1	15.65	17.35	15.975	15.75	16.35
2	2	68	70.1	157	25.8	23.1	11.8	9	26.6	23	14.7	7.5	19.4	18.5	18.1	19.6	15.4	16	19.1	17	19.6	21.6	19.2	18.6	20.5	17	18.8	16.8	17.9	17.6	18.1	18	18.5	18.3	20	15	24.625	10.75	17.325	18.45	19.675	18.35	18.075	17.775
2	1				34.3	28.2	16.5	14.7	32.6	29.7	20.3	16.7	15.6	17.5	15.4	14	13.9	13	15.1	15.6	19.2	15.5	15.1	15.5	14.9	15.5	13.6	15.8	18.9	15.2	14.8	15.9	12.4	15.4	14.6	16.8	31.2	17.05	15	15.025	16.275	15	15.475	15.525
2	2	69	74.1	166	25.4	19.8	13.8	7.9	25.4	19.8	9.6	14.2	18.9	22.7	17.4	17.5	19	14.5	14.8	17.5	16.6	21.7	17.8	17.6	19.3	16.4	16.5	17.6	18	18.9	19.2	15.5	20.1	17.6	17	14.3	22.6	11.375	18.775	16.8	18.5	17.375	18.65	16.5
																																				glaucoma	25.9548	13.425	15.5905	15.919	17.3179	16.053	16.3298	16.0381
																																					9.70488	5.16229	2.90711	2.93113	3.56965	3.32134	3.02782	3.17942
																																				normal	23.5079	12.4487	17.275	16.5342	18.6763	17.1539	18.4355	16.7579
																																					5.96635	5.06092	3.73533	3.32939	4.13769	3.71803	6.12339	3.21368
																																					24.7925	12.9612	16.3009		17.2695		16.855
																																					8.14007	5.07262	3.23011		3.73396		4.07804
																																							17.2279	16.3891
																																							4.08162	3.24436

## Sheet: Figure 2
		Glaucoma patients		Healthy individuals
		Men	Women	Men	Women
	Maximal	35.87	19.85	30.35	19.51
	Submaximal	17.38	10.98	15.6	10.6
		6.8	4.89	3.05	2.42
		3.77	4.38	6.98	2.28
		80.7053		55.5613		68.1333
		58.2878		47.1698		52.7288

## Sheet: Figure 3_A (MAXIMAL)
				Pre	During	Post
			Glaucoma patients	15.5905	17.3179	16.3298
			Healthy individuals	17.275	18.6763	18.4355
				2.90711	3.56965	3.02782
				3.73533	4.13769	6.12339

## Sheet: Figure 3_B (SubMaximal)
				Pre	During	Post
			Glaucoma patients	15.919	16.053	16.0381
			Healthy individuals	16.5342	17.1539	16.7579
				2.93113	3.32134	3.17942
				3.32939	3.71803	3.21368
